# Supplementary material for: Mobile Telemedicine for Buprenorphine Treatment in Rural Populations With Opioid Use Disorder
Source: PubMed Central journal article supplement (PMC8397932; doi:10.1001/jamanetworkopen.2021.18487), 2021-08-27
Supplement: jamanetwopen-e2118487-s001.pdf [file jamanetwopen-e2118487-s001.pdf]

## Supplemental Online Content

Weintraub E, Seneviratne C, Anane J, et al. Mobile telemedicine for buprenorphine treatment in rural populations with opioid use disorder. *JAMA Netw Open*. 2021;4(8):e2118487. doi:10.1001/jamanetworkopen.2021.18487

**eTable 1.** Urine Toxicology Panel

**eTable 2.** Demographic Characteristics for All Enrolled Patients

This supplemental material has been provided by the authors to give readers additional information about their work.

**eTable 1.** Urine Toxicology Panel

| Drug class based on chemical composition | Analyte                        |
|------------------------------------------|--------------------------------|
| Alcohol                                  | Alcohol SCR                    |
|                                          | ETG Screen (Ethyl Glucuronide) |
|                                          | Ethyl Sulfate                  |
| Amphetamine                              | Amphetamine SCR                |
|                                          | Methamphetamine                |
| Barbiturates                             | Barbiturates SCR               |
|                                          | Benzodiazepines SCR            |
|                                          | Butalbital                     |
| Benzodiazepines                          | Benzodiazepines SCR            |
|                                          | 7-Aminoclonazepam              |
|                                          | Lorazepam                      |
|                                          | Oxazepam                       |
|                                          | Nordiazepam                    |
|                                          | Temazepam                      |
|                                          | Alpha-OH-alprazolam            |
| Non-benzodiazepine sedatives             | Zolpidem Metabolite            |
| Cannabinoids                             | Cannabinoids SCR               |
|                                          | Carboxy THC/ THC COOH          |
| Cocaine                                  | Benzoyllecgonine/ Cocaine SCR  |
| NMDA receptor antagonists                | Phencyclidine SCR              |
|                                          | Ecstasy SCR                    |
| Opioids                                  | 6-Acetylmorphine SCR           |
|                                          | Methadone SCR                  |
|                                          | EDDP SCR                       |
|                                          | Opiates SCR                    |

|  |                     |
|--|---------------------|
|  | Oxycodone SCR       |
|  | Buprenorphine SCR   |
|  | Norbuprenorphine    |
|  | Fentanyl            |
|  | Norfentanyl         |
|  | 6-AM (Heroin Mtb)   |
|  | Codein              |
|  | Morphine            |
|  | Tramadol            |
|  | O-Desmethyltramadol |
|  | Oxymorphone         |
|  | Noroxycodone        |
|  | Hydrocodone         |
|  | Norhydrocodone      |
|  | Hydromorphone       |

**eTable 2.** Demographic Characteristics for All Enrolled Patients

| Characteristic                                          | TM-MTU patients (N=94) | <50% TM-MTU visits (N=24) | All enrolled patients (N=118) | *P-value |
|---------------------------------------------------------|------------------------|---------------------------|-------------------------------|----------|
| Average Age in years (S.D.)                             | 36.53 (9.78)           | 38.08 (11.74)             | 36.85 (10.17)                 | 0.51     |
| Gender (men; N, %)                                      | 59 (62.77)             | 14 (58.33)                | 73 (61.83)                    | 0.65     |
| Race (N, %):                                            |                        |                           |                               |          |
| White                                                   | 71 (75.53)             | 19 (75.53)                | 90 (76.27)                    | 0.71     |
| Black or African American                               | 15 (15.96)             | 5 (20.83)                 | 20 (16.95)                    | 0.57     |
| Multiracial                                             | 2 (2.13)               | 0                         | 2 (1.69)                      | n/a      |
| Other/Unknown                                           | 7 (6.38)               | 0                         | 6 (5.08)                      | n/a      |
| Ethnicity (N, %):                                       |                        |                           |                               |          |
| Hispanic                                                | 3 (3.19)               | 1 (4.17)                  | 4 (3.39)                      | 0.82     |
| Not Hispanic                                            | 90 (95.74)             | 19 (79.17)                | 109 (92.37)                   | 0.01     |
| Unknown                                                 | 1 (1.06)               | 4 (16.67)                 | 5 (4.24)                      | 0.001    |
| Patients with positive urine screens at baseline (N, %) |                        |                           |                               |          |
| Alcohol                                                 | 14 (17.95)             | 3 (13.04)                 | 17 (16.83)                    | 0.59     |
| Amphetamines                                            | 15 (19.23)             | 2 (8.7)                   | 17 (16.83)                    | 0.24     |
| Barbiturates                                            | 0                      | 0                         | 0                             | n/a      |
| Benzodiazepines                                         | 6 (7.69)               | 2 (8.70)                  | 8 (7.92)                      | 0.97     |
| Nonbenzodiazepine sedative                              | 0                      | 1 (4.35)                  | 1 (0.99)                      | 0.07     |
| Cannabinoids                                            | 37 (47.44)             | 7 (30.43)                 | 44 (43.56)                    | 0.15     |
| Cocaine                                                 | 10 (12.82)             | 3 (13.04)                 | 13 (12.87)                    | 0.98     |
| NMDA receptor antagonists                               | 1 (1.28)               | 0                         | 1 (0.99)                      | n/a      |
| Opioids (including (nor)buprenorphine) <sup>1</sup>     | 73 (93.59)             | 23 (100.00)               | 96 (95.05)                    | 0.22     |

<sup>1</sup> Includes prescription and non-prescription

|                                        |              |              |              |      |
|----------------------------------------|--------------|--------------|--------------|------|
| Opioids (excluding (nor)buprenorphine) | 45 (57.69)   | 10 (43.48)   | 55 (53.92)   | 0.28 |
| Buprenorphine dosing (in mg, S.D.)     |              |              |              |      |
| Average initial daily dose             | 11.09 (4.84) | 11.24 (4.67) | 11.12 (4.83) | 0.90 |
| Average daily dose across treatment    | 15.24 (5.24) | 15.58 (5.26) | 15.31 (31)   | 0.78 |
| Maximum daily prescribed dose          | 36           | 36           | 36           | n/a  |
| Minimum daily prescribed dose          | 4            | 4            | 4            | n/a  |

---

\*P-value for the comparison between TM-MTU patients and patients who had <50% visits on TM-MTU
